# Supplementary material for: Secretory CAZymes profile and GH19 enzymes analysis of Corallococcus silvisoli c25j21
Source: Front Microbiol. 2024 Feb 5;15:1324153. doi: 10.3389/fmicb.2024.1324153 (PMC10875029; doi:10.3389/fmicb.2024.1324153)
Supplement: Supplementary Table 2 — Data for the venn plots of secreted proteins under different growth conditions. [file Table_2.XLSX]

## Sheet: 3-Set-Venn-dbcan
Blank_Cel_Chi_overlap	dbcan annotation	NCBI Protein ID	Cel_Chi_uniq	dbcan annotation	NCBI Protein ID	Blank_Chi_uniq	dbcan annotation	NCBI Protein ID	Chi_uniq	dbcan annotation	NCBI Protein ID	Blank_Cel_uniq	dbcan annotation	NCBI Protein ID	Cel_uniq	dbcan annotation	NCBI Protein ID	Blank_uniq	dbcan annotation	NCBI Protein ID
fig|6666666.496551.peg.1132			fig|6666666.496551.peg.1653			fig|6666666.496551.peg.2072	PL20(27-255)	WP_143908768.1	fig|6666666.496551.peg.1088			fig|6666666.496551.peg.1010			fig|6666666.496551.peg.1084			fig|6666666.496551.peg.111
fig|6666666.496551.peg.1139			fig|6666666.496551.peg.2142			fig|6666666.496551.peg.2563			fig|6666666.496551.peg.1105			fig|6666666.496551.peg.1050			fig|6666666.496551.peg.1247			fig|6666666.496551.peg.135
fig|6666666.496551.peg.1184			fig|6666666.496551.peg.6242	CBM56(24-112)	WP_143903198.1	fig|6666666.496551.peg.3241			fig|6666666.496551.peg.1194			fig|6666666.496551.peg.1199	CE1(69-284)	WP_161664086.1	fig|6666666.496551.peg.1440			fig|6666666.496551.peg.1638
fig|6666666.496551.peg.1193			fig|6666666.496551.peg.6506			fig|6666666.496551.peg.3359			fig|6666666.496551.peg.1327			fig|6666666.496551.peg.1268			fig|6666666.496551.peg.1493			fig|6666666.496551.peg.1746
fig|6666666.496551.peg.1237			fig|6666666.496551.peg.6972			fig|6666666.496551.peg.3829			fig|6666666.496551.peg.1399			fig|6666666.496551.peg.1334			fig|6666666.496551.peg.1496			fig|6666666.496551.peg.2049
fig|6666666.496551.peg.1256			fig|6666666.496551.peg.7495			fig|6666666.496551.peg.4029			fig|6666666.496551.peg.1444			fig|6666666.496551.peg.1389			fig|6666666.496551.peg.1730			fig|6666666.496551.peg.2070
fig|6666666.496551.peg.1258						fig|6666666.496551.peg.4963			fig|6666666.496551.peg.1542			fig|6666666.496551.peg.1420			fig|6666666.496551.peg.1788			fig|6666666.496551.peg.2326
fig|6666666.496551.peg.1801						fig|6666666.496551.peg.5144			fig|6666666.496551.peg.1580			fig|6666666.496551.peg.1462			fig|6666666.496551.peg.1894			fig|6666666.496551.peg.29
fig|6666666.496551.peg.2577						fig|6666666.496551.peg.5735			fig|6666666.496551.peg.1739			fig|6666666.496551.peg.1547			fig|6666666.496551.peg.2137	CBM4(46-167)+GH6(203-461)	WP_161665998.1	fig|6666666.496551.peg.294
fig|6666666.496551.peg.2748						fig|6666666.496551.peg.690			fig|6666666.496551.peg.1795			fig|6666666.496551.peg.1600			fig|6666666.496551.peg.2265			fig|6666666.496551.peg.3219
fig|6666666.496551.peg.3112									fig|6666666.496551.peg.1898			fig|6666666.496551.peg.1627	CBM32(408-532)	WP_161665726.1	fig|6666666.496551.peg.2336			fig|6666666.496551.peg.3220
fig|6666666.496551.peg.3163									fig|6666666.496551.peg.1936			fig|6666666.496551.peg.1959	CE4(30-148)+CBM8(259-399)	WP_161665925.1	fig|6666666.496551.peg.2385			fig|6666666.496551.peg.3570
fig|6666666.496551.peg.3171									fig|6666666.496551.peg.243			fig|6666666.496551.peg.1981			fig|6666666.496551.peg.2394			fig|6666666.496551.peg.3667
fig|6666666.496551.peg.3625									fig|6666666.496551.peg.2652			fig|6666666.496551.peg.2440			fig|6666666.496551.peg.2409			fig|6666666.496551.peg.445
fig|6666666.496551.peg.3819									fig|6666666.496551.peg.2845			fig|6666666.496551.peg.2464			fig|6666666.496551.peg.2570			fig|6666666.496551.peg.4535
fig|6666666.496551.peg.3888									fig|6666666.496551.peg.2866			fig|6666666.496551.peg.2493			fig|6666666.496551.peg.2647			fig|6666666.496551.peg.4596
fig|6666666.496551.peg.3964									fig|6666666.496551.peg.3032			fig|6666666.496551.peg.2552	GH13_11(262-634)	WP_161666220.1	fig|6666666.496551.peg.2831			fig|6666666.496551.peg.4648
fig|6666666.496551.peg.4202									fig|6666666.496551.peg.3043			fig|6666666.496551.peg.2561			fig|6666666.496551.peg.2863			fig|6666666.496551.peg.4671
fig|6666666.496551.peg.4288	GH13_6(58-339)+CBM20(427-513)	WP_161666963.1							fig|6666666.496551.peg.3100			fig|6666666.496551.peg.2833			fig|6666666.496551.peg.2890			fig|6666666.496551.peg.476
fig|6666666.496551.peg.4301									fig|6666666.496551.peg.3232			fig|6666666.496551.peg.2871			fig|6666666.496551.peg.3200			fig|6666666.496551.peg.4865
fig|6666666.496551.peg.4429									fig|6666666.496551.peg.3281			fig|6666666.496551.peg.2977			fig|6666666.496551.peg.3255			fig|6666666.496551.peg.4912
fig|6666666.496551.peg.4509									fig|6666666.496551.peg.3554			fig|6666666.496551.peg.3026			fig|6666666.496551.peg.3378			fig|6666666.496551.peg.5037
fig|6666666.496551.peg.4728									fig|6666666.496551.peg.3859			fig|6666666.496551.peg.3063			fig|6666666.496551.peg.3394			fig|6666666.496551.peg.518
fig|6666666.496551.peg.543									fig|6666666.496551.peg.4050			fig|6666666.496551.peg.3097	AA5(16-643)	WP_235685955.1	fig|6666666.496551.peg.3571			fig|6666666.496551.peg.5409
fig|6666666.496551.peg.5536									fig|6666666.496551.peg.4272			fig|6666666.496551.peg.3167			fig|6666666.496551.peg.3603			fig|6666666.496551.peg.5821
fig|6666666.496551.peg.5570									fig|6666666.496551.peg.4302			fig|6666666.496551.peg.3355			fig|6666666.496551.peg.3713			fig|6666666.496551.peg.6545
fig|6666666.496551.peg.5867									fig|6666666.496551.peg.4486			fig|6666666.496551.peg.3784			fig|6666666.496551.peg.3933			fig|6666666.496551.peg.6743
fig|6666666.496551.peg.5947									fig|6666666.496551.peg.4615			fig|6666666.496551.peg.3886			fig|6666666.496551.peg.4097			fig|6666666.496551.peg.6927
fig|6666666.496551.peg.5962									fig|6666666.496551.peg.462			fig|6666666.496551.peg.3950			fig|6666666.496551.peg.4114			fig|6666666.496551.peg.7076
fig|6666666.496551.peg.6060									fig|6666666.496551.peg.4634			fig|6666666.496551.peg.396			fig|6666666.496551.peg.4237
fig|6666666.496551.peg.6386									fig|6666666.496551.peg.4752			fig|6666666.496551.peg.4017			fig|6666666.496551.peg.4917
fig|6666666.496551.peg.6544									fig|6666666.496551.peg.4768			fig|6666666.496551.peg.4080			fig|6666666.496551.peg.4942
fig|6666666.496551.peg.6654									fig|6666666.496551.peg.4786			fig|6666666.496551.peg.415			fig|6666666.496551.peg.5151
fig|6666666.496551.peg.6822									fig|6666666.496551.peg.4842			fig|6666666.496551.peg.4221	CBM32(58-172)+CBM32(192-308)+GH3(645-850)+CBM32(1343-1454)	WP_161666925.1	fig|6666666.496551.peg.5236
fig|6666666.496551.peg.7059									fig|6666666.496551.peg.507			fig|6666666.496551.peg.4252			fig|6666666.496551.peg.5420
fig|6666666.496551.peg.7127									fig|6666666.496551.peg.5318			fig|6666666.496551.peg.4348			fig|6666666.496551.peg.5616
fig|6666666.496551.peg.7319									fig|6666666.496551.peg.5319			fig|6666666.496551.peg.4350			fig|6666666.496551.peg.5641
fig|6666666.496551.peg.7423									fig|6666666.496551.peg.5453			fig|6666666.496551.peg.4434			fig|6666666.496551.peg.6131
fig|6666666.496551.peg.93									fig|6666666.496551.peg.5498			fig|6666666.496551.peg.4489			fig|6666666.496551.peg.6498	GH13_13(510-904)	WP_161665074.1
									fig|6666666.496551.peg.553			fig|6666666.496551.peg.470			fig|6666666.496551.peg.6527	AA4(13-510)	WP_161665094.1
									fig|6666666.496551.peg.5742			fig|6666666.496551.peg.4721			fig|6666666.496551.peg.6561
									fig|6666666.496551.peg.5764			fig|6666666.496551.peg.4729			fig|6666666.496551.peg.6638
									fig|6666666.496551.peg.5775			fig|6666666.496551.peg.4803			fig|6666666.496551.peg.6647
									fig|6666666.496551.peg.5868			fig|6666666.496551.peg.4820			fig|6666666.496551.peg.6659	GH13_10(133-445)	WP_161665149.1
									fig|6666666.496551.peg.5917			fig|6666666.496551.peg.4968			fig|6666666.496551.peg.6663
									fig|6666666.496551.peg.594	CBM13(48-127)+GH19(202-404)	WP_143898266.1	fig|6666666.496551.peg.5002			fig|6666666.496551.peg.7124
									fig|6666666.496551.peg.6021			fig|6666666.496551.peg.5268			fig|6666666.496551.peg.7231
									fig|6666666.496551.peg.6585	CBM48(15-106)+GH13_11(186-539)	WP_161665121.1	fig|6666666.496551.peg.5335			fig|6666666.496551.peg.7462
									fig|6666666.496551.peg.6628			fig|6666666.496551.peg.5408			fig|6666666.496551.peg.7618
									fig|6666666.496551.peg.6748			fig|6666666.496551.peg.544			fig|6666666.496551.peg.863
									fig|6666666.496551.peg.6830			fig|6666666.496551.peg.5553			fig|6666666.496551.peg.924
									fig|6666666.496551.peg.6852			fig|6666666.496551.peg.5563
									fig|6666666.496551.peg.6870			fig|6666666.496551.peg.5640
									fig|6666666.496551.peg.7486			fig|6666666.496551.peg.5647
									fig|6666666.496551.peg.7559			fig|6666666.496551.peg.5650
									fig|6666666.496551.peg.7603			fig|6666666.496551.peg.5767
									fig|6666666.496551.peg.779			fig|6666666.496551.peg.5970
									fig|6666666.496551.peg.787			fig|6666666.496551.peg.5995
									fig|6666666.496551.peg.925			fig|6666666.496551.peg.6044
									fig|6666666.496551.peg.932			fig|6666666.496551.peg.6118
												fig|6666666.496551.peg.6174
												fig|6666666.496551.peg.6371
												fig|6666666.496551.peg.6505
												fig|6666666.496551.peg.6549
												fig|6666666.496551.peg.7138
												fig|6666666.496551.peg.7166
												fig|6666666.496551.peg.7175
												fig|6666666.496551.peg.7197
												fig|6666666.496551.peg.7246
												fig|6666666.496551.peg.73	CBM13(394-509)	WP_143907968.1
												fig|6666666.496551.peg.7333
												fig|6666666.496551.peg.7391
												fig|6666666.496551.peg.7544
												fig|6666666.496551.peg.7617
												fig|6666666.496551.peg.777
