# Supplementary material for: Secretory CAZymes profile and GH19 enzymes analysis of Corallococcus silvisoli c25j21
Source: Front Microbiol. 2024 Feb 5;15:1324153. doi: 10.3389/fmicb.2024.1324153 (PMC10875029; doi:10.3389/fmicb.2024.1324153)
Supplement: Supplementary Table 3 — The secretory proteome sequencing data. [file Table_3.XLSX]

## Sheet: proteinGroups
Protein	ProteinGroup	FastaHeaders	Proteins	Peptides	RazorUniquePeptides	UniquePeptides	Coverage	MolWeight	LFQ intensity Blank-1	LFQ intensity Blank-2	LFQ intensity Blank-3	LFQ intensity Chi-1	LFQ intensity Chi-2	LFQ intensity Chi-3	LFQ intensity Cel-1	LFQ intensity Cel-2	LFQ intensity Cel-3	Identified or Quantified
fig|6666666.496551.peg.1001	fig|6666666.496551.peg.1001		1	1	1	1	3	58.145										Identified
fig|6666666.496551.peg.1010	fig|6666666.496551.peg.1010		1	3	3	3	6.4	77.656		320470000	220750000				173700000	82568000	84190000	Quantified
fig|6666666.496551.peg.1050	fig|6666666.496551.peg.1050		1	3	3	3	6.9	50.04	38880000	17694000	31459000				22189000	39211000	32764000	Quantified
fig|6666666.496551.peg.1084	fig|6666666.496551.peg.1084		1	1	1	1	7.3	11.187							726830			Identified
fig|6666666.496551.peg.1088	fig|6666666.496551.peg.1088		1	1	1	1	0.8	170.92				47244000						Identified
fig|6666666.496551.peg.1105	fig|6666666.496551.peg.1105		1	1	1	1	2.7	32.192						977380				Identified
fig|6666666.496551.peg.111	fig|6666666.496551.peg.111		1	1	1	1	6.7	13.715		2380600								Identified
fig|6666666.496551.peg.1132	fig|6666666.496551.peg.1132		1	10	10	10	21.9	53.324	269420000	1295500000	1430300000	656410000	72407000	16519000	685950000	403740000	1124500000	Quantified
fig|6666666.496551.peg.1139	fig|6666666.496551.peg.1139		1	1	1	1	6.9	15.765		7671800		3828400	6247700	4571400			5687600	Quantified
fig|6666666.496551.peg.1184	fig|6666666.496551.peg.1184		1	4	4	4	4.7	102.47	28003000	21866000	9002200		9305500	8302100	22585000	8967100	10760000	Quantified
fig|6666666.496551.peg.1193	fig|6666666.496551.peg.1193		1	6	6	6	23.9	49.407		12249000		68062000	42812000	36405000	261870000	139230000	38757000	Quantified
fig|6666666.496551.peg.1194	fig|6666666.496551.peg.1194		1	2	2	2	7.3	44.962						7621400				Identified
fig|6666666.496551.peg.1199	fig|6666666.496551.peg.1199		1	1	1	1	2.7	33.311		9477500	3737700					4028900		Quantified
fig|6666666.496551.peg.1237	fig|6666666.496551.peg.1237		1	3	3	3	11.5	61.165		9314400		28497000		18540000			1405300	Quantified
fig|6666666.496551.peg.1246	fig|6666666.496551.peg.1246		1	1	1	1	1.6	67.216										Identified
fig|6666666.496551.peg.1247	fig|6666666.496551.peg.1247		1	2	2	2	48.1	7.956							5764000		1390900	Quantified
fig|6666666.496551.peg.1248	fig|6666666.496551.peg.1248		1	1	1	1	4.3	18.067										Identified
fig|6666666.496551.peg.1256	fig|6666666.496551.peg.1256		1	3	3	3	12.5	29.144		4992400	3232100	7138900	5411400	7447900	3392700	2335200	4421400	Quantified
fig|6666666.496551.peg.1258	fig|6666666.496551.peg.1258		1	5	5	5	10	67.653		20050000	17777000	40610000	11582000		140450000	17192000	21708000	Quantified
fig|6666666.496551.peg.1268	fig|6666666.496551.peg.1268		1	1	1	1	3.4	41.554		6702400							3394300	Identified
fig|6666666.496551.peg.1309	fig|6666666.496551.peg.1309		1	1	1	1	2.3	75.296										Identified
fig|6666666.496551.peg.1327	fig|6666666.496551.peg.1327		1	1	1	1	10.6	14.199						22651000				Identified
fig|6666666.496551.peg.1334	fig|6666666.496551.peg.1334		1	2	2	2	16.9	7.4374		32050000	9449500				2003000	1850100	2444100	Quantified
fig|6666666.496551.peg.135	fig|6666666.496551.peg.135		1	1	1	1	2.2	43.907	439190									Identified
fig|6666666.496551.peg.1389	fig|6666666.496551.peg.1389		1	3	3	3	3.5	165.63	2996800	35362000	7233000				10421000	5969700	14496000	Quantified
fig|6666666.496551.peg.1399	fig|6666666.496551.peg.1399		1	1	1	1	2.5	53.391						9995400				Identified
fig|6666666.496551.peg.1420	fig|6666666.496551.peg.1420		1	2	2	2	1.3	214.77		786820	1879100					8342200	2021000	Quantified
fig|6666666.496551.peg.1440	fig|6666666.496551.peg.1440		1	1	1	1	6.8	23.141									365210	Identified
fig|6666666.496551.peg.1444	fig|6666666.496551.peg.1444		1	1	1	1	4.1	45.182						17148000				Identified
fig|6666666.496551.peg.1462	fig|6666666.496551.peg.1462		1	1	1	1	6.2	20.612			2610000						765600	Identified
fig|6666666.496551.peg.1493	fig|6666666.496551.peg.1493		1	1	1	1	4.2	30.403							102970000		183520000	Quantified
fig|6666666.496551.peg.1496	fig|6666666.496551.peg.1496		1	1	1	1	10.5	9.3531							987950			Identified
fig|6666666.496551.peg.1498	fig|6666666.496551.peg.1498		1	1	1	1	1.4	56.866										Identified
fig|6666666.496551.peg.1542	fig|6666666.496551.peg.1542		1	1	1	1	1	96.071						9000900				Identified
fig|6666666.496551.peg.1547	fig|6666666.496551.peg.1547		1	2	2	2	8.4	26.519		24113000					99555000	10725000	12570000	Quantified
fig|6666666.496551.peg.1580	fig|6666666.496551.peg.1580		1	1	1	1	4.1	37.117				4485600						Identified
fig|6666666.496551.peg.1600	fig|6666666.496551.peg.1600		1	4	4	4	6.8	68.937	2781900000		1498600000				724330000	2030200000	269820000	Quantified
fig|6666666.496551.peg.1622	fig|6666666.496551.peg.1622		1	1	1	1	4.6	38.057										Identified
fig|6666666.496551.peg.1627	fig|6666666.496551.peg.1627		1	1	1	1	2.6	54.988		44740000	11701000				2948700	89456000	54981000	Quantified
fig|6666666.496551.peg.1638	fig|6666666.496551.peg.1638		1	1	1	1	5.1	20.008	11504000		56102000							Quantified
fig|6666666.496551.peg.1653	fig|6666666.496551.peg.1653		1	1	1	1	3.8	42.276				2786600			5599800			Identified
fig|6666666.496551.peg.1730	fig|6666666.496551.peg.1730		1	1	1	1	1.4	53.032							199270			Identified
fig|6666666.496551.peg.1739	fig|6666666.496551.peg.1739		1	1	1	1	2	48.697						12090000				Identified
fig|6666666.496551.peg.1746	fig|6666666.496551.peg.1746		1	1	1	1	8.5	12.249			7981800							Identified
fig|6666666.496551.peg.1788	fig|6666666.496551.peg.1788		1	1	1	1	5.3	32.554								1543500		Identified
fig|6666666.496551.peg.1795	fig|6666666.496551.peg.1795		1	1	1	1	18.4	5.5858						5130700				Identified
fig|6666666.496551.peg.1800	fig|6666666.496551.peg.1800		1	1	1	1	5.8	42.55										Identified
fig|6666666.496551.peg.1801	fig|6666666.496551.peg.1801		1	4	4	4	17.4	29.599	41123000	13530000	47798000	24542000			15105000	25872000	60496000	Quantified
fig|6666666.496551.peg.1816	fig|6666666.496551.peg.1816		1	1	1	1	2.6	39.024										Identified
fig|6666666.496551.peg.1846	fig|6666666.496551.peg.1846		1	1	1	1	2	37.51										Identified
fig|6666666.496551.peg.1894	fig|6666666.496551.peg.1894		1	1	1	1	3.7	73.069							2964000			Identified
fig|6666666.496551.peg.1898	fig|6666666.496551.peg.1898		1	1	1	1	1	76.246						50386000				Identified
fig|6666666.496551.peg.190	fig|6666666.496551.peg.190		1	1	1	1	1.5	52.638										Identified
fig|6666666.496551.peg.1936	fig|6666666.496551.peg.1936		1	1	1	1	2.8	49.849					1467300	754880				Quantified
fig|6666666.496551.peg.1959	fig|6666666.496551.peg.1959		1	1	1	1	3.5	43.17	7143700	18799000	32681000				12004000	55085000	5426300	Quantified
fig|6666666.496551.peg.1981	fig|6666666.496551.peg.1981		1	4	4	4	9.8	72.049	55614000	45271000					19164000	39992000	26302000	Quantified
fig|6666666.496551.peg.2049	fig|6666666.496551.peg.2049		1	1	1	1	2.6	43.765		1548100								Identified
fig|6666666.496551.peg.2070	fig|6666666.496551.peg.2070		1	2	2	2	5.2	36.445		1279300								Identified
fig|6666666.496551.peg.2072	fig|6666666.496551.peg.2072		1	3	3	3	16.5	28.577		10276000		13356000	31933000	27338000				Quantified
fig|6666666.496551.peg.2137	fig|6666666.496551.peg.2137		1	1	1	1	3.1	50.475							804600	2287300	3206100	Quantified
fig|6666666.496551.peg.2142	fig|6666666.496551.peg.2142		1	2	2	2	16	25.877				6209000	1462400	1684000	31815000	2163700		Quantified
fig|6666666.496551.peg.2251	fig|6666666.496551.peg.2251		1	1	1	1	3.1	49.743										Identified
fig|6666666.496551.peg.2265	fig|6666666.496551.peg.2265		1	1	1	1	8.9	10.065									833620	Identified
fig|6666666.496551.peg.2326	fig|6666666.496551.peg.2326		1	1	1	1	3.6	53.737	6538200									Identified
fig|6666666.496551.peg.2336	fig|6666666.496551.peg.2336		1	2	2	2	12.4	23.314							5584100			Identified
fig|6666666.496551.peg.2346	fig|6666666.496551.peg.2346		1	1	1	1	9	20.993										Identified
fig|6666666.496551.peg.2385	fig|6666666.496551.peg.2385		1	1	1	1	14.9	9.537							879260			Identified
fig|6666666.496551.peg.2394	fig|6666666.496551.peg.2394		1	1	1	1	2.2	56.089							977670	1996500		Quantified
fig|6666666.496551.peg.2409	fig|6666666.496551.peg.2409		1	2	2	2	1.6	61.671									8399700	Identified
fig|6666666.496551.peg.2429	fig|6666666.496551.peg.2429		1	1	1	1	3.7	36.819										Identified
fig|6666666.496551.peg.243	fig|6666666.496551.peg.243		1	1	1	1	2.1	44.851						60765000				Identified
fig|6666666.496551.peg.2440	fig|6666666.496551.peg.2440		1	2	2	2	3.3	87.615	8220000	2221800	11349000					3948600	3286700	Quantified
fig|6666666.496551.peg.2464	fig|6666666.496551.peg.2464		1	3	3	3	12.9	22.445		42583000							22903000	Identified
fig|6666666.496551.peg.2493	fig|6666666.496551.peg.2493		1	2	2	2	3	46.455		20289000	17927000				224090000	25305000	32113000	Quantified
fig|6666666.496551.peg.2552	fig|6666666.496551.peg.2552		1	2	2	2	2.8	88.791		9211400	5364300				32755000	5959000	9408000	Quantified
fig|6666666.496551.peg.2561	fig|6666666.496551.peg.2561		1	1	1	1	5.8	19.99		32779000	9903100				98372000	102370000	64417000	Quantified
fig|6666666.496551.peg.2563	fig|6666666.496551.peg.2563		1	1	1	1	2.3	54.12			6794700		4220100					Identified
fig|6666666.496551.peg.2570	fig|6666666.496551.peg.2570		1	1	1	1	2.5	75.042							10775000			Identified
fig|6666666.496551.peg.2577	fig|6666666.496551.peg.2577		1	4	4	4	10.2	42.16		50593000	7464000	4984700	6019900	6820700	111280000	11697000	46073000	Quantified
fig|6666666.496551.peg.2606	fig|6666666.496551.peg.2606		1	1	1	1	2.5	46.819										Identified
fig|6666666.496551.peg.2647	fig|6666666.496551.peg.2647		1	1	1	1	8.6	18.627									6579300	Identified
fig|6666666.496551.peg.2652	fig|6666666.496551.peg.2652		1	1	1	1	4.4	33.595				5485400	13529000	4689300				Quantified
fig|6666666.496551.peg.2748	fig|6666666.496551.peg.2748		1	1	1	1	5.1	20.639	4416500	465770000	44142000	8345400	1315300	9307600	158860000	880300000	317900000	Quantified
fig|6666666.496551.peg.2831	fig|6666666.496551.peg.2831		1	1	1	1	4.6	19.082									286780000	Identified
fig|6666666.496551.peg.2833	fig|6666666.496551.peg.2833		1	1	1	1	1.7	51.519	5011100	5605100	7831200				2120800	5342200	5549200	Quantified
fig|6666666.496551.peg.2845	fig|6666666.496551.peg.2845		1	1	1	1	5.4	18.201				2506000						Identified
fig|6666666.496551.peg.2863	fig|6666666.496551.peg.2863		1	1	1	1	10	10.848									13663000	Identified
fig|6666666.496551.peg.2866	fig|6666666.496551.peg.2866		1	1	1	1	15.4	6.921						3774400				Identified
fig|6666666.496551.peg.2871	fig|6666666.496551.peg.2871		1	2	2	2	5.3	35.66	117190000	5012100	31095000					1329800	610330	Quantified
fig|6666666.496551.peg.2884	fig|6666666.496551.peg.2884		1	1	1	1	5.7	34.179										Identified
fig|6666666.496551.peg.2890	fig|6666666.496551.peg.2890		1	1	1	1	6.3	26.311								1294800	1216900	Quantified
fig|6666666.496551.peg.29	fig|6666666.496551.peg.29		1	1	1	1	0.9	130.31		525250								Identified
fig|6666666.496551.peg.290	fig|6666666.496551.peg.290		1	1	1	1	3.9	39.558										Identified
fig|6666666.496551.peg.294	fig|6666666.496551.peg.294		1	1	1	1	3.6	41.28		773440								Identified
fig|6666666.496551.peg.4001	fig|6666666.496551.peg.4001;fig|6666666.496551.peg.2948	;	2	1	1	1	4	18.751										Identified
fig|6666666.496551.peg.2977	fig|6666666.496551.peg.2977		1	1	1	1	5.2	21.667		1631200	29104000				3464700			Quantified
fig|6666666.496551.peg.3026	fig|6666666.496551.peg.3026		1	1	1	1	2.5	43.151		729640					1957900		3007900	Quantified
fig|6666666.496551.peg.3032	fig|6666666.496551.peg.3032		1	1	1	1	7.9	21.731						4846400				Identified
fig|6666666.496551.peg.3043	fig|6666666.496551.peg.3043		1	1	1	1	3.2	49.644						15778000				Identified
fig|6666666.496551.peg.3063	fig|6666666.496551.peg.3063		1	2	2	2	5.4	43.285		3633400					3509500			Identified
fig|6666666.496551.peg.3097	fig|6666666.496551.peg.3097		1	3	3	3	3.5	96.745		10256000	26416000				81691000	8587900		Quantified
fig|6666666.496551.peg.3100	fig|6666666.496551.peg.3100		1	1	1	1	20.5	4.0935						19081000				Identified
fig|6666666.496551.peg.3112	fig|6666666.496551.peg.3112		1	3	3	3	25	26.497		1808300		16714000	17824000	23191000	8573300			Quantified
fig|6666666.496551.peg.3163	fig|6666666.496551.peg.3163		1	4	4	4	18.9	30.412		172340000	30055000	85375000	53336000	46548000	194140000	36710000	19260000	Quantified
fig|6666666.496551.peg.3167	fig|6666666.496551.peg.3167		1	1	1	1	5.2	22.535	4172400						9358500			Identified
fig|6666666.496551.peg.3171	fig|6666666.496551.peg.3171		1	3	3	3	2.3	134.84		13203000			23625000		4974200			Identified
fig|6666666.496551.peg.3191	fig|6666666.496551.peg.3191		1	1	1	1	20.3	8.8553										Identified
fig|6666666.496551.peg.3200	fig|6666666.496551.peg.3200		1	1	1	1	2	43.073									6611800	Identified
fig|6666666.496551.peg.3219	fig|6666666.496551.peg.3219		1	1	1	1	1.3	78.557	2701500	1243700	2903500							Quantified
fig|6666666.496551.peg.3220	fig|6666666.496551.peg.3220		1	2	2	2	7	20.307		2236800								Identified
fig|6666666.496551.peg.3232	fig|6666666.496551.peg.3232		1	1	1	1	15.7	16.754				8772300						Identified
fig|6666666.496551.peg.3241	fig|6666666.496551.peg.3241		1	1	1	1	4.1	38.011	3403900			2575500						Identified
fig|6666666.496551.peg.3249	fig|6666666.496551.peg.3249		1	1	1	1	5	22.946										Identified
fig|6666666.496551.peg.3255	fig|6666666.496551.peg.3255		1	1	1	1	2.9	35.973							12900000			Identified
fig|6666666.496551.peg.3281	fig|6666666.496551.peg.3281		1	1	1	1	2.3	36.541				24703000						Identified
fig|6666666.496551.peg.335	fig|6666666.496551.peg.335		1	1	1	1	2.7	29.769										Identified
fig|6666666.496551.peg.3355	fig|6666666.496551.peg.3355		1	1	1	1	9.7	10.55	19794000	4008900	12912000				817400			Quantified
fig|6666666.496551.peg.3359	fig|6666666.496551.peg.3359		1	8	8	8	19.2	57.351		1674300		8270500	60043000	11883000				Quantified
fig|6666666.496551.peg.3378	fig|6666666.496551.peg.3378		1	1	1	1	5.7	17.321							1064700			Identified
fig|6666666.496551.peg.3394	fig|6666666.496551.peg.3394		1	1	1	1	6	19.985							3512100			Identified
fig|6666666.496551.peg.3458	fig|6666666.496551.peg.3458		1	1	1	1	4.1	46.094										Identified
fig|6666666.496551.peg.3554	fig|6666666.496551.peg.3554		1	1	1	1	6.9	17.183						5001700				Identified
fig|6666666.496551.peg.3570	fig|6666666.496551.peg.3570		1	2	2	2	3	75.951		7935100	3047000							Quantified
fig|6666666.496551.peg.3571	fig|6666666.496551.peg.3571		1	1	1	1	4.1	31.033							6860900			Identified
fig|6666666.496551.peg.3580	fig|6666666.496551.peg.3580		1	1	1	1	1.8	61.277										Identified
fig|6666666.496551.peg.3603	fig|6666666.496551.peg.3603		1	1	1	1	5.7	15.366									2170200	Identified
fig|6666666.496551.peg.3625	fig|6666666.496551.peg.3625		1	2	2	2	3.6	87.775	8141200	3217300	6477700		7241200	9504400	4296400	9409800	10274000	Quantified
fig|6666666.496551.peg.3638	fig|6666666.496551.peg.3638		1	1	1	1	1.1	110.48										Identified
fig|6666666.496551.peg.3667	fig|6666666.496551.peg.3667		1	1	1	1	1.5	70.852		1607200								Identified
fig|6666666.496551.peg.3713	fig|6666666.496551.peg.3713		1	1	1	1	4.9	17.726							459120	2804300		Quantified
fig|6666666.496551.peg.3784	fig|6666666.496551.peg.3784		1	1	1	1	1.5	67.854	23611000	462040000	70770000				9109100	126110000	124750000	Quantified
fig|6666666.496551.peg.3819	fig|6666666.496551.peg.3819		1	7	7	7	17.5	54.834	1381900000	553680000	1604000000	46686000	105090000	143310000	983950000	802440000	479360000	Quantified
fig|6666666.496551.peg.3829	fig|6666666.496551.peg.3829		1	2	2	2	7.7	50.517	12307000	2404500	50643000		1275100					Quantified
fig|6666666.496551.peg.3859	fig|6666666.496551.peg.3859		1	1	1	1	1	91.998						73003000				Identified
fig|6666666.496551.peg.3886	fig|6666666.496551.peg.3886		1	3	3	3	6.8	58.078	35836000	33234000	53174000				100530000	253450000	249340000	Quantified
fig|6666666.496551.peg.3888	fig|6666666.496551.peg.3888		1	4	3	3	9.8	77.473	108230000	428850000	92343000	16048000	3889300	2671400	621440000	426390000	1039000000	Quantified
fig|6666666.496551.peg.3896	fig|6666666.496551.peg.3896		1	1	1	1	9	8.9049										Identified
fig|6666666.496551.peg.3933	fig|6666666.496551.peg.3933		1	1	1	1	3	29.205							12430000	13928000	21142000	Quantified
fig|6666666.496551.peg.3950	fig|6666666.496551.peg.3950		1	1	1	1	1.3	75.481	90516000	45579000	22150000				901670	85181000	99779000	Quantified
fig|6666666.496551.peg.396	fig|6666666.496551.peg.396		1	1	1	1	1	119.91	42163000		17531000				249460	1577300	4206200	Quantified
fig|6666666.496551.peg.3964	fig|6666666.496551.peg.3964		1	3	3	3	2.7	157.02	70531000	74608000	18395000	9819200			6889100	39384000	20094000	Quantified
fig|6666666.496551.peg.4017	fig|6666666.496551.peg.4017		1	1	1	1	0.7	247.37	20494000	4688200	121330000					11184000	2537300	Quantified
fig|6666666.496551.peg.4029	fig|6666666.496551.peg.4029		1	2	2	2	15.9	25.415		1817800		4591100	6508200	3154300				Quantified
fig|6666666.496551.peg.4050	fig|6666666.496551.peg.4050		1	1	1	1	31.8	4.7195				7133000						Identified
fig|6666666.496551.peg.4059	fig|6666666.496551.peg.4059		1	1	1	1	4.8	32.894										Identified
fig|6666666.496551.peg.4080	fig|6666666.496551.peg.4080		1	5	5	5	7.8	79.688	46900000	168770000	86239000				165460000	406010000	445560000	Quantified
fig|6666666.496551.peg.4097	fig|6666666.496551.peg.4097		1	2	2	2	4	36.718							898670	1499600		Quantified
fig|6666666.496551.peg.410	fig|6666666.496551.peg.410		1	1	1	1	0.9	83.583										Identified
fig|6666666.496551.peg.4114	fig|6666666.496551.peg.4114		1	1	1	1	2.6	54.122							16649000			Identified
fig|6666666.496551.peg.415	fig|6666666.496551.peg.415		1	1	1	1	2.1	46.266		66963000					11436000	73495000	69778000	Quantified
fig|6666666.496551.peg.4177	fig|6666666.496551.peg.4177		1	1	1	1	0.2	796.62										Identified
fig|6666666.496551.peg.4202	fig|6666666.496551.peg.4202		1	2	2	2	3.8	55.866	147550000	93317000	12676000	8502000		43137000	1013800	57804000	68213000	Quantified
fig|6666666.496551.peg.4221	fig|6666666.496551.peg.4221		1	6	6	6	3.4	160.36	10331000	6280800	3178000				70374000	139440000	24245000	Quantified
fig|6666666.496551.peg.4225	fig|6666666.496551.peg.4225		1	1	1	1	1.3	62.013										Identified
fig|6666666.496551.peg.4237	fig|6666666.496551.peg.4237		1	2	2	2	1	518.48									6743800	Identified
fig|6666666.496551.peg.4252	fig|6666666.496551.peg.4252		1	2	2	2	6.6	28.481		6020800					32351000	1878000	1952100	Quantified
fig|6666666.496551.peg.4272	fig|6666666.496551.peg.4272		1	1	1	1	1.5	75.733						4441800				Identified
fig|6666666.496551.peg.4288	fig|6666666.496551.peg.4288		1	6	6	6	14	55.31		81991000	46476000	19339000	18901000	13108000	197690000	27088000	6261100	Quantified
fig|6666666.496551.peg.4301	fig|6666666.496551.peg.4301		1	2	2	2	11.5	22.105		36288000	3383800	3199700			65667000	9973100	66552000	Quantified
fig|6666666.496551.peg.4302	fig|6666666.496551.peg.4302		1	2	2	2	10.3	37.999				5236900	4811400					Quantified
fig|6666666.496551.peg.4348	fig|6666666.496551.peg.4348		1	2	2	2	15	19.847	1949000	54698000	49851000				56675000	49132000	668880000	Quantified
fig|6666666.496551.peg.4350	fig|6666666.496551.peg.4350		1	2	2	2	13.8	22.426		10858000	9223100				7448000	10900000	10045000	Quantified
fig|6666666.496551.peg.4400	fig|6666666.496551.peg.4400		1	1	1	1	5	17.455										Identified
fig|6666666.496551.peg.4429	fig|6666666.496551.peg.4429		1	5	5	5	6.7	110.35	906250000	326850000	712930000		2771600		181580000	251860000	700110000	Quantified
fig|6666666.496551.peg.4434	fig|6666666.496551.peg.4434		1	3	3	3	19.4	21.807		76316000	14294000				114840000	3732300	10330000	Quantified
fig|6666666.496551.peg.445	fig|6666666.496551.peg.445		1	1	1	1	8.5	13.997		478020								Identified
fig|6666666.496551.peg.4486	fig|6666666.496551.peg.4486		1	1	1	1	8.7	15.098						6638700				Identified
fig|6666666.496551.peg.4489	fig|6666666.496551.peg.4489		1	1	1	1	2.4	48.353		1220800	2568300				2123800		2738700	Quantified
fig|6666666.496551.peg.4509	fig|6666666.496551.peg.4509		1	2	2	2	5.4	54.842		2901500			9869400	7286700	3186100	3599400		Quantified
fig|6666666.496551.peg.4535	fig|6666666.496551.peg.4535		1	2	2	2	21.8	17.045		1863700	5887100							Quantified
fig|6666666.496551.peg.4596	fig|6666666.496551.peg.4596		1	1	1	1	9.3	9.7921		8130400								Identified
fig|6666666.496551.peg.4615	fig|6666666.496551.peg.4615		1	1	1	1	1.8	41.398				520310000	457430000	418350000				Quantified
fig|6666666.496551.peg.462	fig|6666666.496551.peg.462		1	1	1	1	5.4	19.94						5369300				Identified
fig|6666666.496551.peg.4634	fig|6666666.496551.peg.4634		1	1	1	1	3.2	47.856						3170900				Identified
fig|6666666.496551.peg.4648	fig|6666666.496551.peg.4648		1	1	1	1	2.5	50.716		1743000								Identified
fig|6666666.496551.peg.4671	fig|6666666.496551.peg.4671		1	1	1	1	2.1	68.103		2761000								Identified
fig|6666666.496551.peg.470	fig|6666666.496551.peg.470		1	1	1	1	3.1	43.399		922900					5844500			Identified
fig|6666666.496551.peg.4721	fig|6666666.496551.peg.4721		1	1	1	1	1.4	66.648			2148700				5435100			Identified
fig|6666666.496551.peg.4728	fig|6666666.496551.peg.4728		1	3	3	3	9	30.535	47257000	153750000	76341000	158470000	72067000	81659000	49433000		46243000	Quantified
fig|6666666.496551.peg.4729	fig|6666666.496551.peg.4729		1	2	2	2	6.5	41.093		888990						4583400		Identified
fig|6666666.496551.peg.4752	fig|6666666.496551.peg.4752		1	4	4	4	22.5	21.279				51819000	66991000	93377000				Quantified
fig|6666666.496551.peg.476	fig|6666666.496551.peg.476		1	1	1	1	5.9	29.526			3903300							Identified
fig|6666666.496551.peg.4768	fig|6666666.496551.peg.4768		1	1	1	1	8.1	8.9671						11460000				Identified
fig|6666666.496551.peg.4786	fig|6666666.496551.peg.4786		1	1	1	1	5.2	30.718				3803600						Identified
fig|6666666.496551.peg.4803	fig|6666666.496551.peg.4803		1	1	1	1	2.2	55.654		2374600					341910			Identified
fig|6666666.496551.peg.4820	fig|6666666.496551.peg.4820		1	1	1	1	3.2	23.279	2719700	527270	2299600					1216000	1459800	Quantified
fig|6666666.496551.peg.4842	fig|6666666.496551.peg.4842		1	1	1	1	1.4	62.611						154950000				Identified
fig|6666666.496551.peg.4865	fig|6666666.496551.peg.4865		1	1	1	1	1.5	56.147			541740							Identified
fig|6666666.496551.peg.4912	fig|6666666.496551.peg.4912		1	2	2	2	2.5	94.015		5450500								Identified
fig|6666666.496551.peg.4917	fig|6666666.496551.peg.4917		1	1	1	1	2.8	29.326									19689000	Identified
fig|6666666.496551.peg.4942	fig|6666666.496551.peg.4942		1	5	4	4	8.5	88.791								970390	7141800	Quantified
fig|6666666.496551.peg.4963	fig|6666666.496551.peg.4963		1	2	2	2	9.7	26.268		529950	1039800		2610600	12571000				Quantified
fig|6666666.496551.peg.4968	fig|6666666.496551.peg.4968		1	2	2	2	2.2	82.651	18226000	34246000	74850000				7709400	55188000	52429000	Quantified
fig|6666666.496551.peg.5002	fig|6666666.496551.peg.5002		1	1	1	1	2.4	131.25		7908800						12043000		Identified
fig|6666666.496551.peg.5037	fig|6666666.496551.peg.5037		1	1	1	1	4	80.257			7490400							Identified
fig|6666666.496551.peg.507	fig|6666666.496551.peg.507		1	1	1	1	1.3	62.338						3411100				Identified
fig|6666666.496551.peg.5087	fig|6666666.496551.peg.5087		1	1	1	1	11.2	13.163										Identified
fig|6666666.496551.peg.5144	fig|6666666.496551.peg.5144		1	2	2	2	5.8	29.566		3265500		7153200						Identified
fig|6666666.496551.peg.5151	fig|6666666.496551.peg.5151		1	1	1	1	13.6	15.441							3716800			Identified
fig|6666666.496551.peg.518	fig|6666666.496551.peg.518		1	1	1	1	4.6	31.615		1421800	4505100							Quantified
fig|6666666.496551.peg.5196	fig|6666666.496551.peg.5196		1	1	1	1	18.3	8.5844										Identified
fig|6666666.496551.peg.5236	fig|6666666.496551.peg.5236		1	2	2	2	6.1	41.379							15400000	5430600	43805000	Quantified
fig|6666666.496551.peg.5251	fig|6666666.496551.peg.5251		1	1	1	1	1.2	64.502										Identified
fig|6666666.496551.peg.5268	fig|6666666.496551.peg.5268		1	1	1	1	0.4	189.31	21782000	32189000	33064000				18456000	27252000	86239000	Quantified
fig|6666666.496551.peg.5318	fig|6666666.496551.peg.5318		1	3	3	3	23.4	19.744				33600000	62628000	45344000				Quantified
fig|6666666.496551.peg.5319	fig|6666666.496551.peg.5319		1	3	3	3	23.8	19.442				17864000	20655000	16216000				Quantified
fig|6666666.496551.peg.5335	fig|6666666.496551.peg.5335		1	3	3	3	7.3	47.203		14459000	6963100				4139400	6088300	55446000	Quantified
fig|6666666.496551.peg.5408	fig|6666666.496551.peg.5408		1	2	2	2	4.1	48.856		8850500					8547500	13899000	8768800	Quantified
fig|6666666.496551.peg.5409	fig|6666666.496551.peg.5409		1	1	1	1	4.9	26.504		2558800								Identified
fig|6666666.496551.peg.5420	fig|6666666.496551.peg.5420		1	2	2	2	4.1	23.458								2288500		Identified
fig|6666666.496551.peg.543	fig|6666666.496551.peg.543		1	8	8	8	7.9	114.7	43660000	889870000	102940000	1137100			504950000	512340000	538830000	Quantified
fig|6666666.496551.peg.544	fig|6666666.496551.peg.544		1	1	1	1	4.2	24.824	109820000	212660000	103210000				34927000	239810000	437060000	Quantified
fig|6666666.496551.peg.5453	fig|6666666.496551.peg.5453		1	1	1	1	6.3	13.915						2583900				Identified
fig|6666666.496551.peg.5498	fig|6666666.496551.peg.5498		1	1	1	1	2.8	39.051						71264000				Identified
fig|6666666.496551.peg.553	fig|6666666.496551.peg.553		1	1	1	1	7.2	12.576				2473900						Identified
fig|6666666.496551.peg.5536	fig|6666666.496551.peg.5536		1	1	1	1	0.6	185.88	933770000	1304100000	1335700000	26664000			493760000	1069200000	1434400000	Quantified
fig|6666666.496551.peg.5553	fig|6666666.496551.peg.5553		1	1	1	1	5.8	21.022		4449200	8942600					3474300	4012900	Quantified
fig|6666666.496551.peg.5563	fig|6666666.496551.peg.5563		1	2	2	2	8.3	30.141		3157000	2948900				20122000			Quantified
fig|6666666.496551.peg.5570	fig|6666666.496551.peg.5570		1	1	1	1	1.6	49.941	853790000	2825200000	5268600000	159840000	43147000		2183300000	2860200000	1789200000	Quantified
fig|6666666.496551.peg.5616	fig|6666666.496551.peg.5616		1	2	2	2	9.6	28.529							12263000	2150500	17821000	Quantified
fig|6666666.496551.peg.5640	fig|6666666.496551.peg.5640		1	4	4	4	4.9	111.24		8622700					26953000	5001100		Quantified
fig|6666666.496551.peg.5641	fig|6666666.496551.peg.5641		1	2	2	2	4.7	59.203							18335000			Identified
fig|6666666.496551.peg.5647	fig|6666666.496551.peg.5647		1	1	1	1	1.1	95.284		27567000	10968000					10583000	32657000	Quantified
fig|6666666.496551.peg.5650	fig|6666666.496551.peg.5650		1	1	1	1	4.9	22.659		2227800	5605200					1718900	2051400	Quantified
fig|6666666.496551.peg.5735	fig|6666666.496551.peg.5735		1	1	1	1	6.1	31.198		8134200		4900000						Identified
fig|6666666.496551.peg.5742	fig|6666666.496551.peg.5742		1	2	2	2	11.9	35.238					2417300	1404000				Quantified
fig|6666666.496551.peg.5764	fig|6666666.496551.peg.5764		1	1	1	1	0.9	98.193				4083000						Identified
fig|6666666.496551.peg.5767	fig|6666666.496551.peg.5767		1	2	2	2	2.7	51.886		2025100							2307100	Identified
fig|6666666.496551.peg.5775	fig|6666666.496551.peg.5775		1	3	3	2	5.7	29.315						56932000				Identified
fig|6666666.496551.peg.5821	fig|6666666.496551.peg.5821		1	1	1	1	1.6	89.435		3388100								Identified
fig|6666666.496551.peg.5867	fig|6666666.496551.peg.5867		1	4	4	4	33	27.443	30555000	70285000	9845100	257800000	5052900	20913000	790690000	139780000	19055000	Quantified
fig|6666666.496551.peg.5868	fig|6666666.496551.peg.5868		1	1	1	1	2.1	46.87						22402000				Identified
fig|6666666.496551.peg.5917	fig|6666666.496551.peg.5917		1	1	1	1	2	46.871				4001000						Identified
fig|6666666.496551.peg.594	fig|6666666.496551.peg.594		1	3	3	3	10.9	42.911					4504800	3473600				Quantified
fig|6666666.496551.peg.5947	fig|6666666.496551.peg.5947		1	3	3	3	21.4	31.177		3386800	3138500	10614000	22075000	24110000	10454000	6751600	2421700	Quantified
fig|6666666.496551.peg.5962	fig|6666666.496551.peg.5962		1	1	1	1	3.4	48.713		850140				1067300	3056900		2195300	Quantified
fig|6666666.496551.peg.5970	fig|6666666.496551.peg.5970		1	4	4	4	15.3	32.726	4943500	149840000	35827000				39573000	22907000	9802700	Quantified
fig|6666666.496551.peg.5995	fig|6666666.496551.peg.5995		1	1	1	1	2.5	62.912	47113000	19001000	59337000				28057000	96148000	49486000	Quantified
fig|6666666.496551.peg.6021	fig|6666666.496551.peg.6021		1	1	1	1	4.1	28.404						26128000				Identified
fig|6666666.496551.peg.6044	fig|6666666.496551.peg.6044		1	1	1	1	9.1	13.553	8933300	52728000	18672000				30897000	21175000	73600000	Quantified
fig|6666666.496551.peg.6060	fig|6666666.496551.peg.6060		1	2	2	2	4.6	56.956		42331000	5992300	1691900			3122700	27473000	15982000	Quantified
fig|6666666.496551.peg.6064	fig|6666666.496551.peg.6064		1	1	1	1	7.4	35.063										Identified
fig|6666666.496551.peg.6118	fig|6666666.496551.peg.6118		1	1	1	1	1.7	75.968	33919000	4556000	16962000				1403300	3945900	2674500	Quantified
fig|6666666.496551.peg.6131	fig|6666666.496551.peg.6131		1	1	1	1	2.2	44.718								1127500		Identified
fig|6666666.496551.peg.6154	fig|6666666.496551.peg.6154		1	1	1	1	12.1	12.574										Identified
fig|6666666.496551.peg.6174	fig|6666666.496551.peg.6174		1	1	1	1	10.5	16.852		9661200	3367200						10009000	Quantified
fig|6666666.496551.peg.6242	fig|6666666.496551.peg.6242		1	1	1	1	1.7	81.359				20134000	20850000	23943000	239190	3322900	3174700	Quantified
fig|6666666.496551.peg.6259	fig|6666666.496551.peg.6259		1	1	1	1	1.8	41.071										Identified
fig|6666666.496551.peg.6315	fig|6666666.496551.peg.6315		1	1	1	1	2.6	42.597										Identified
fig|6666666.496551.peg.6371	fig|6666666.496551.peg.6371		1	1	1	1	3.3	47.678		976130	4567400				8358400	4748100		Quantified
fig|6666666.496551.peg.6386	fig|6666666.496551.peg.6386		1	5	5	5	10.6	68.09	11775000	172400000	38541000	136280000	93057000	60776000	561100000	75567000	22012000	Quantified
fig|6666666.496551.peg.6498	fig|6666666.496551.peg.6498		1	1	1	1	1	122.75							12594000			Identified
fig|6666666.496551.peg.6505	fig|6666666.496551.peg.6505		1	2	2	2	6	32.842	103000000	70589000	43025000				14827000	10569000	42188000	Quantified
fig|6666666.496551.peg.6506	fig|6666666.496551.peg.6506		1	1	1	1	1.4	79.704					6522500		5646700	8272900	4209900	Quantified
fig|6666666.496551.peg.6527	fig|6666666.496551.peg.6527		1	1	1	1	4.1	55.948							2951600			Identified
fig|6666666.496551.peg.6544	fig|6666666.496551.peg.6544		1	6	6	6	17.7	42.914	40982000	50016000	81343000	24845000	14789000	22699000	185100000	73192000	43817000	Quantified
fig|6666666.496551.peg.6545	fig|6666666.496551.peg.6545		1	1	1	1	1.2	100.79		444970								Identified
fig|6666666.496551.peg.6549	fig|6666666.496551.peg.6549		1	1	1	1	3.2	30.048	9689800	9665000	12309000				3970500	23069000	15889000	Quantified
fig|6666666.496551.peg.6561	fig|6666666.496551.peg.6561		1	1	1	1	3	77.82							2326000			Identified
fig|6666666.496551.peg.6570	fig|6666666.496551.peg.6570		1	1	1	1	1	109.75										Identified
fig|6666666.496551.peg.6585	fig|6666666.496551.peg.6585		1	1	1	1	2.4	80.577					8516400	46564000				Quantified
fig|6666666.496551.peg.6628	fig|6666666.496551.peg.6628		1	1	1	1	2.2	41.729					20062000					Identified
fig|6666666.496551.peg.6638	fig|6666666.496551.peg.6638		1	1	1	1	2.2	67.517							227740	3645000	4915800	Quantified
fig|6666666.496551.peg.6647	fig|6666666.496551.peg.6647		1	1	1	1	3.3	41.593							1424100			Identified
fig|6666666.496551.peg.6654	fig|6666666.496551.peg.6654		1	8	8	8	40.6	29.362		81999000	10711000	194550000	387840000	357220000	451290000	149790000	70171000	Quantified
fig|6666666.496551.peg.6659	fig|6666666.496551.peg.6659		1	1	1	1	1.3	67.982									6860000	Identified
fig|6666666.496551.peg.6663	fig|6666666.496551.peg.6663		1	1	1	1	2.4	56.868								418230		Identified
fig|6666666.496551.peg.674	fig|6666666.496551.peg.674		1	1	1	1	1.7	63.517										Identified
fig|6666666.496551.peg.6743	fig|6666666.496551.peg.6743		1	1	1	1	8.6	19.182		2139100								Identified
fig|6666666.496551.peg.6748	fig|6666666.496551.peg.6748		1	1	1	1	1	111.23						2560100				Identified
fig|6666666.496551.peg.6822	fig|6666666.496551.peg.6822		1	3	3	3	9.7	54.816	15799000	49068000	41124000			6754300	8512300	15824000	69093000	Quantified
fig|6666666.496551.peg.6830	fig|6666666.496551.peg.6830		1	1	1	1	3	58.187						8659700				Identified
fig|6666666.496551.peg.6852	fig|6666666.496551.peg.6852		1	1	1	1	7	16.015						7178900				Identified
fig|6666666.496551.peg.6870	fig|6666666.496551.peg.6870		1	2	2	2	6.6	37.977				4316300	6384500	3579700				Quantified
fig|6666666.496551.peg.690	fig|6666666.496551.peg.690		1	1	1	1	2.4	46.83		300150		3462900						Identified
fig|6666666.496551.peg.6927	fig|6666666.496551.peg.6927		1	1	1	1	10.2	11.818		930800								Identified
fig|6666666.496551.peg.6972	fig|6666666.496551.peg.6972		1	1	1	1	7.5	39.702				2344600	41300000	3841500			417080	Quantified
fig|6666666.496551.peg.7059	fig|6666666.496551.peg.7059		1	7	7	6	20	66.476	1794100000	2827600000	60910000	357070000	205320000	119210000	1304300000	571260000	244770000	Quantified
fig|6666666.496551.peg.7076	fig|6666666.496551.peg.7076		1	1	1	1	3	36.347		3016000	951360							Quantified
fig|6666666.496551.peg.7124	fig|6666666.496551.peg.7124		1	1	1	1	2.3	71.417							1134200	1904000		Quantified
fig|6666666.496551.peg.7127	fig|6666666.496551.peg.7127		1	7	7	7	8.4	123.22	164960000	715760000	549060000	48841000	52588000	64683000	1127200000	1329100000	293870000	Quantified
fig|6666666.496551.peg.7138	fig|6666666.496551.peg.7138		1	2	2	2	3.3	92.069	15651000	27343000	19566000					15523000	8902900	Quantified
fig|6666666.496551.peg.7141	fig|6666666.496551.peg.7141		1	1	1	1	8.9	12.832										Identified
fig|6666666.496551.peg.7145	fig|6666666.496551.peg.7145		1	1	1	1	9.8	18.623										Identified
fig|6666666.496551.peg.7166	fig|6666666.496551.peg.7166		1	1	1	1	14	16.655		4358600	3515100				2940000			Quantified
fig|6666666.496551.peg.7175	fig|6666666.496551.peg.7175		1	1	1	1	3.2	47.802	28845000	2841200	1647800				4067500		3343000	Quantified
fig|6666666.496551.peg.7197	fig|6666666.496551.peg.7197		1	2	2	2	6.6	42.585		1606600					2009200		172740	Quantified
fig|6666666.496551.peg.7231	fig|6666666.496551.peg.7231		1	1	1	1	8.5	14.737									1485200	Identified
fig|6666666.496551.peg.7246	fig|6666666.496551.peg.7246		1	2	2	2	1.2	180.4	47450000	109690000	74324000				30709000	35874000	45315000	Quantified
fig|6666666.496551.peg.73	fig|6666666.496551.peg.73		1	2	2	2	2.9	52.243			13867000				23239000	14269000	30714000	Quantified
fig|6666666.496551.peg.7319	fig|6666666.496551.peg.7319		1	6	6	6	13.6	62.731		14773000	1823600	11626000	1966000	2557700	90906000	10463000	67199000	Quantified
fig|6666666.496551.peg.7333	fig|6666666.496551.peg.7333		1	1	1	1	1.7	64.067		14840000	11899000					1030400		Quantified
fig|6666666.496551.peg.7391	fig|6666666.496551.peg.7391		1	1	1	1	10.9	12.925		1937500							366320	Identified
fig|6666666.496551.peg.7423	fig|6666666.496551.peg.7423		1	18	18	17	28.7	81.667	434910000	1702000000	392150000	308820000	191200000	81990000	3219800000	1358900000	2112000000	Quantified
fig|6666666.496551.peg.7436	fig|6666666.496551.peg.7436		1	1	1	1	3.9	37.536										Identified
fig|6666666.496551.peg.7444	fig|6666666.496551.peg.7444		1	1	1	1	1.8	40.803										Identified
fig|6666666.496551.peg.7462	fig|6666666.496551.peg.7462		1	1	1	1	1.3	77.234								2852300		Identified
fig|6666666.496551.peg.7486	fig|6666666.496551.peg.7486		1	1	1	1	1.2	73.239						2842100				Identified
fig|6666666.496551.peg.7495	fig|6666666.496551.peg.7495		1	1	1	1	2.6	59.597				826220					849820	Identified
fig|6666666.496551.peg.7544	fig|6666666.496551.peg.7544		1	2	2	2	17.2	7.3643	40871000	133600000	361790000				20128000	50302000	54151000	Quantified
fig|6666666.496551.peg.7559	fig|6666666.496551.peg.7559		1	1	1	1	8.1	21.454						7767900				Identified
fig|6666666.496551.peg.7603	fig|6666666.496551.peg.7603		1	1	1	1	12	11.433				7237700	9808200	9102700				Quantified
fig|6666666.496551.peg.7617	fig|6666666.496551.peg.7617		1	6	6	6	21.9	44.185		9871500	2079800				655750		1300300	Quantified
fig|6666666.496551.peg.7618	fig|6666666.496551.peg.7618		1	1	1	1	1.8	72.801							1694100	1370300		Quantified
fig|6666666.496551.peg.777	fig|6666666.496551.peg.777		1	3	3	3	11.3	58.632	2316900	6446700	13293000				2943500	5927600	14554000	Quantified
fig|6666666.496551.peg.779	fig|6666666.496551.peg.779		1	1	1	1	1.5	78.764						3122200				Identified
fig|6666666.496551.peg.787	fig|6666666.496551.peg.787		1	1	1	1	4.1	39.908						34348000				Identified
fig|6666666.496551.peg.797	fig|6666666.496551.peg.797		1	1	1	1	5	37.614										Identified
fig|6666666.496551.peg.863	fig|6666666.496551.peg.863		1	1	1	1	1.4	60.475									1062900	Identified
fig|6666666.496551.peg.924	fig|6666666.496551.peg.924		1	3	3	3	5	85.123									2677800	Identified
fig|6666666.496551.peg.925	fig|6666666.496551.peg.925		1	3	3	3	6.9	52.53				1342100	3222400	3702200				Quantified
fig|6666666.496551.peg.93	fig|6666666.496551.peg.93		1	15	15	15	17.1	117.88	258320000	246070000	622300000	206980000	88858000	118910000	322960000	143460000	64263000	Quantified
fig|6666666.496551.peg.932	fig|6666666.496551.peg.932		1	1	1	1	11	13.437						10979000				Identified
